# Supplementary material
Source: publisher figshare collection journal article supplement (https://sage.figshare.com/ndownloader/files/15017300)
Supplement: Supplementary file 1 [file 15017300]

Leclair, L., Laukner, H., & Yamamoto, C. (2019). An occupational therapy community development practice process. *Canadian Journal of Occupational Therapy*, 86.

## Appendix B: Focus group questions

Prior to the teleconference discussion, we request that you review the summary and be prepared to share your general reactions, comments and clarification to the questions below:

### General Impressions

1. What elements of this description seemed to most accurately capture your experience?
2. What elements of this description didn't seem to fit your experience? Where do you have questions or concerns about this description?

### Clarifying Questions

3. Values: To what extent have your personal values/beliefs guided your work with the community? How about your occupational therapy professional values and beliefs?
4. Getting started: Can you tell us more about how you initiate your interactions with communities/agencies and why this might be a longer, less clearly defined process?
5. Assessment: We heard that there are challenges with conducting formal assessment. What would help you do formal assessment with your communities?
6. Occupational Lens: What unique perspective do you bring to your work with communities and how does this help you distinguish what you do from other professionals on your team?
7. Community occupations: Some examples of bringing people together to share in collective occupations included: jewellery making, open mic night, community garden, community kitchen, and a bicycle repair shop. Can you think of other examples of how collective, community occupations fit in your practice?
8. CD skills: Are there additional CD skills you have that were not captured? Could you tell us more about how you used "champions", how you "facilitated" and how you "empowered"?
9. CD continuum: There seems to be a range of activities (from individual interventions to program planning to policy work) that OTs engage in. How do you see these working together?
10. Preparation: What did you find was most helpful in preparing for community development work? What else might help others in preparing for this work?
11. Support: We heard some uncertainty/doubt in these CD roles. How can the profession (professional organizations, managers, individuals) support occupational therapists working in these roles?
12. Sharing our findings: How might these findings be shared in a way that is most useful?
13. Additional comments?
